# Supplementary material for: Electronic conductivity of alkyne-capped ruthenium nanoparticles
Source: Royal Society of Chemistry journal article supplement (doi:10.1039/c2nr30213f), 2012-01-01
Supplement: c2nr30213f.pdf [file c2nr30213f.pdf]

*Electronic Supplementary Information*

## **Electronic Conductivity of Alkyne-Capped Ruthenium Nanoparticles**

Xiongwu Kang and Shaowei Chen\*

*Department of Chemistry and Biochemistry, University of California, 1156 High Street,  
Santa Cruz, California 95064*

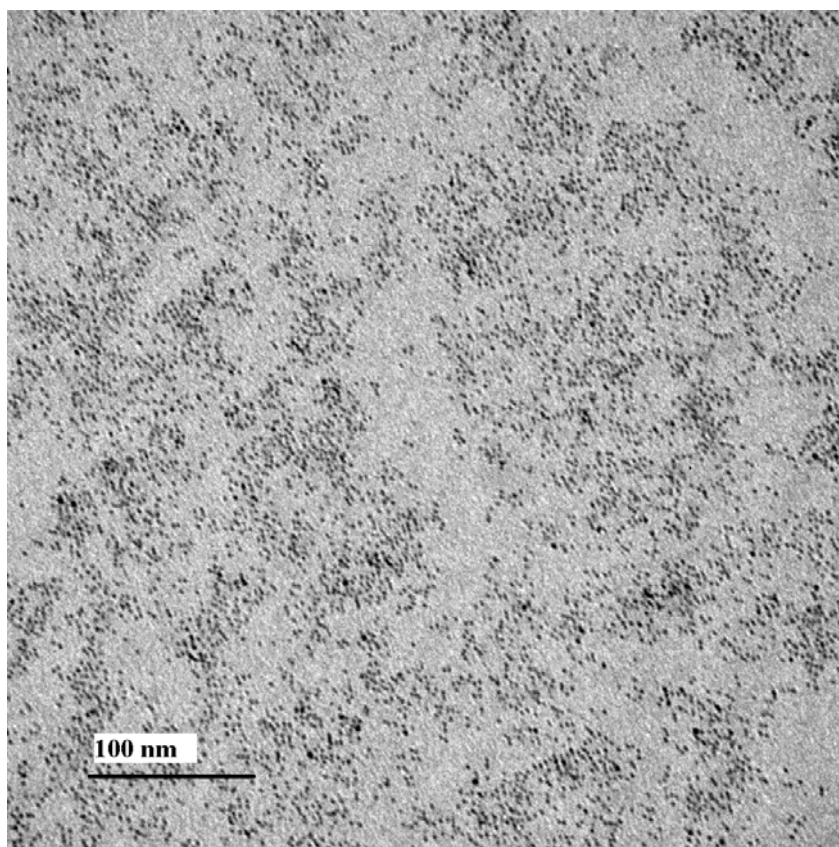

**Figure S1.** Representative TEM micrograph of ruthenium nanoparticles prepared by thermolysis of  $\text{RuCl}_3$  in 1,2-propanediol at 165 °C.

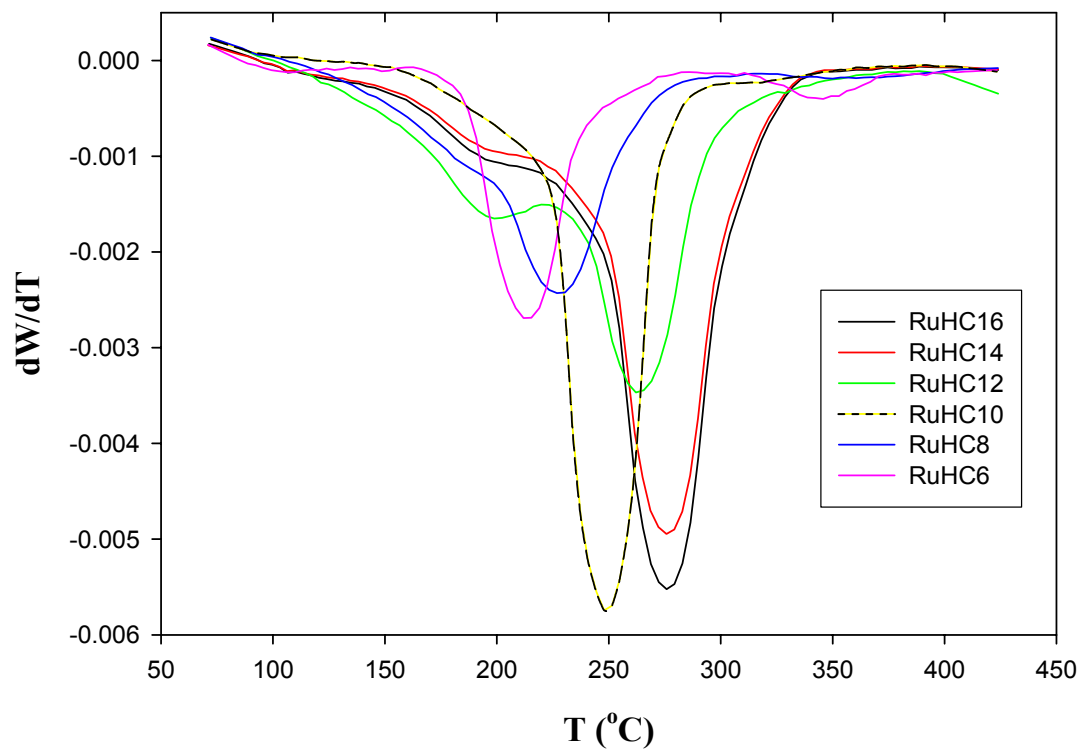

**Figure S2.** First-order derivatives of the weight loss curves of the varied nanoparticle samples by TGA measurements, from which the transition temperature ( $T_g$ ) was determined (and summarized in Table 1).

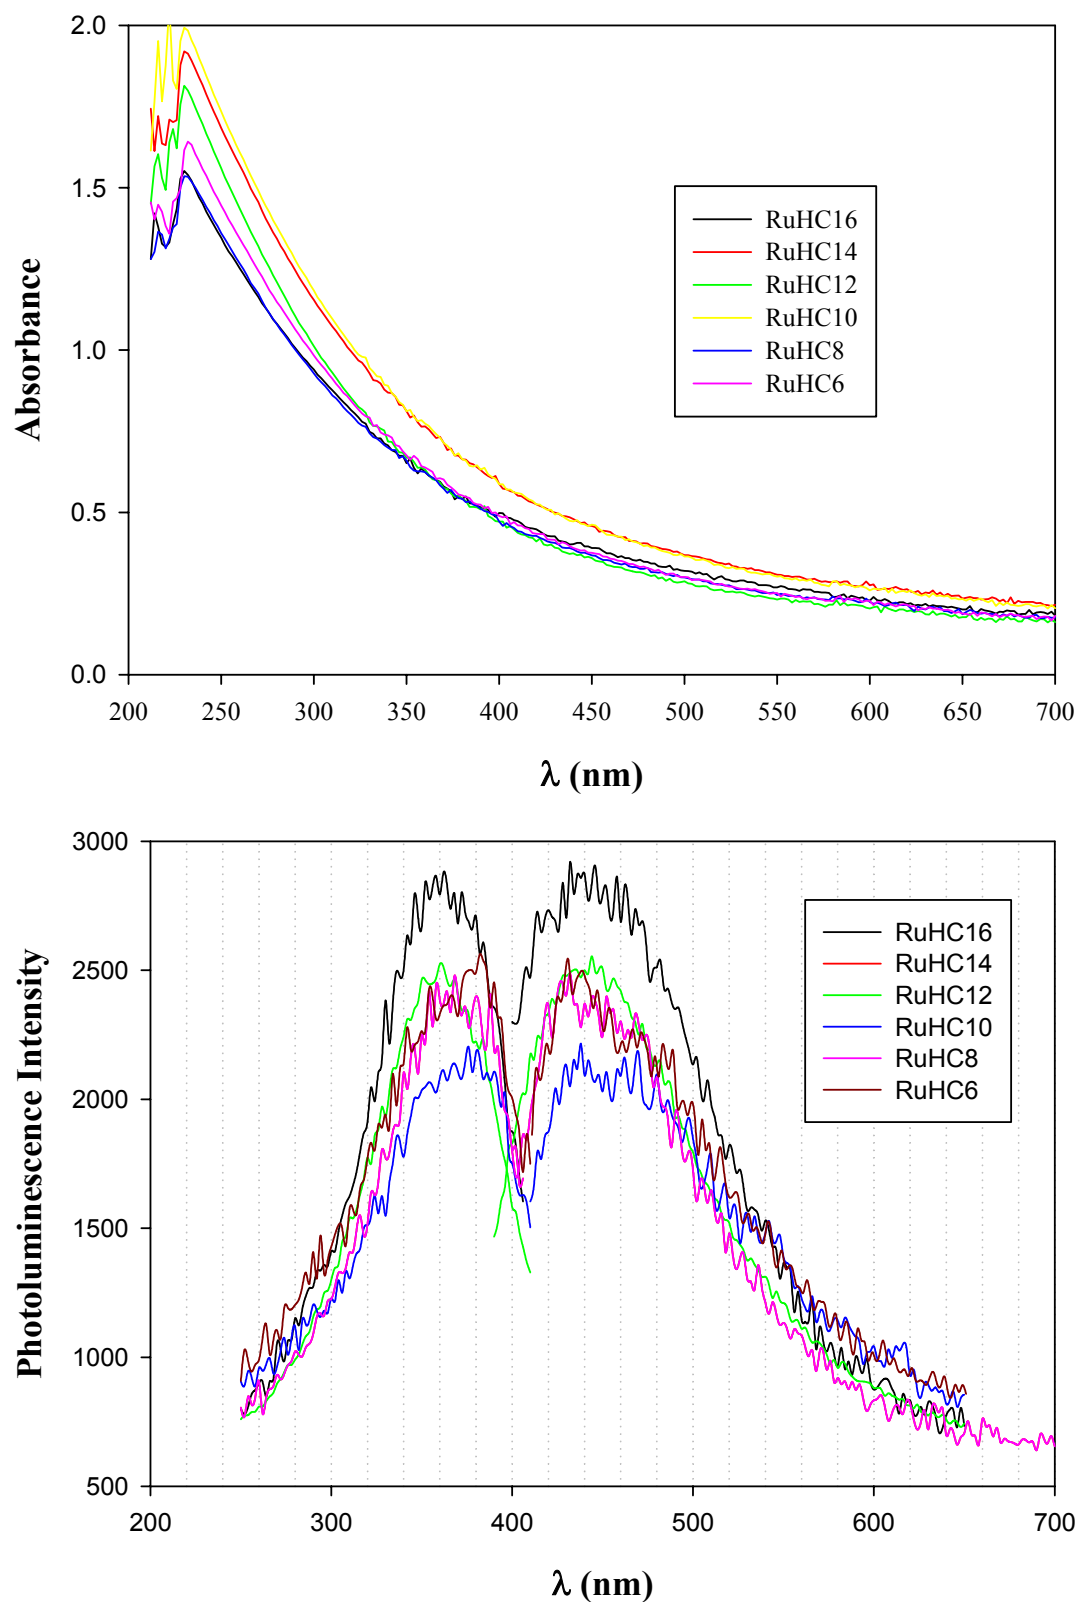

**Figure S3.** (top) UV-vis absorption and (bottom) photoluminescence spectra of alkyne-capped ruthenium nanoparticles in  $\text{CH}_2\text{Cl}_2$ .
